# Supplementary material
Source: HighWire-hosted journal article supplement (https://www.jneurosci.org/content/39/3/420)
Supplement: inline-supplementary-material-4 [file inline-supplementary-material-4.pdf]

## Extended Data

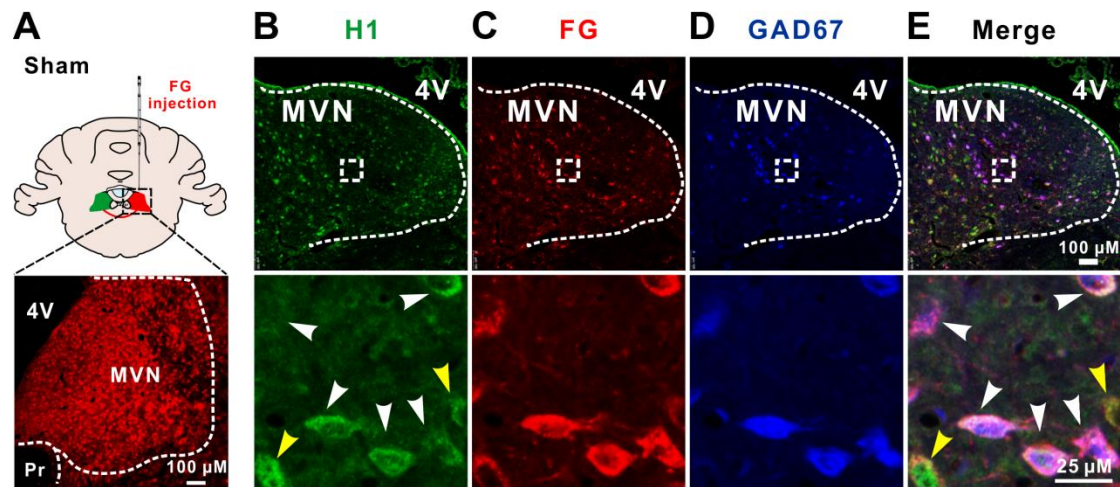

**Figure 2-1.** The expression of H1 receptor on the GABAergic vestibular commissural neurons in sham rats. Related to Figure 2. **A**, Diagram and a brain section of sham-operated rat showing the injection site of FG in MVN. **B-E**, Triple immunostainings for H1 receptor (*green*; **B**), FG (*red*; **C**) and GAD67 (*blue*; **D**) in the MVN contralateral to the FG injection side. White arrowheads in the merged image (**B** and **E** lower panel) indicate the H1/FG/GAD67 triple-labelled GABAergic MVN commissural neurons, whereas yellow arrowheads in the in the merged image (**B** and **E** lower panel) indicate H1/FG double-labelled non-GABAergic (glutamatergic) commissural neurons.

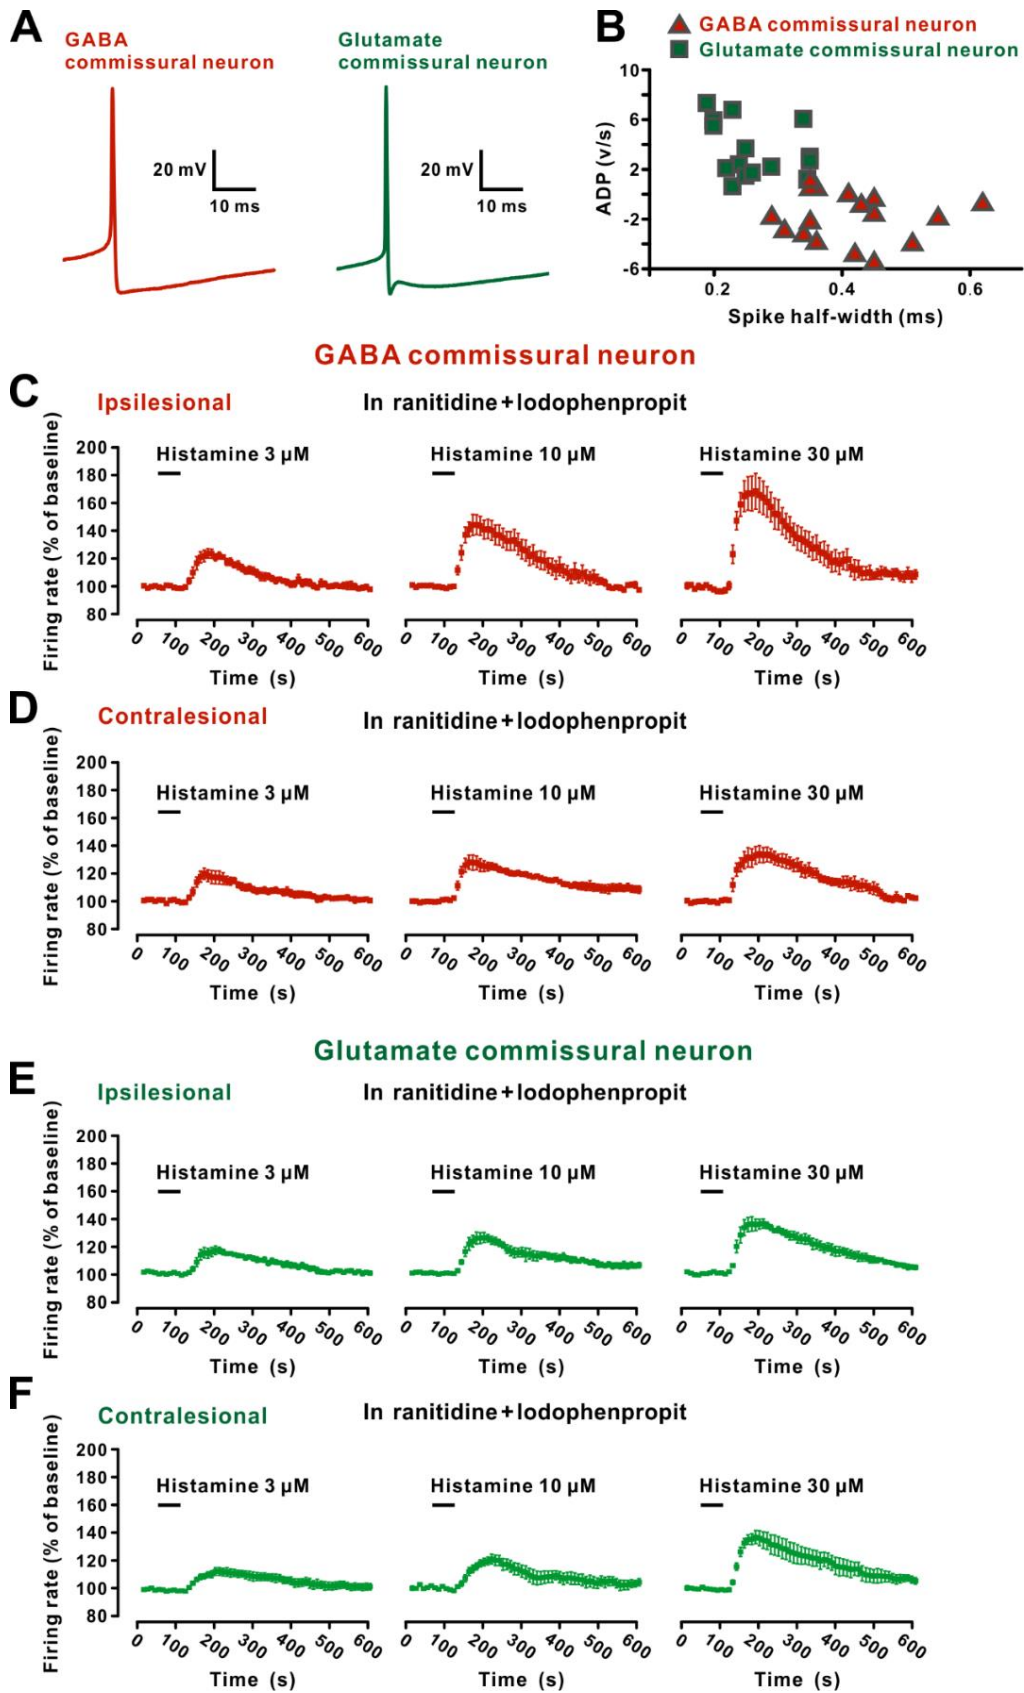

**Figure 3-1.** The excitation induced by H1 receptor activation in the MVN

commissural neurons after UL. Related to Figure 3. **A**, Action potentials from a GABA commissural neuron (left panel, *red*) and a glutamate commissural neuron (right panel, *green*). **B**, Relationship between ADP after spike repolarization and action potential width at half-height. **C,D**, PSTHs of group data show that activation of H1 receptor by application of histamine in the presence of ranitidine (H2 receptor antagonist) and iodophenpropit (H3 receptor antagonist) induced a concentration-dependent excitation on the ipsilesional (**C**) and contralesional (**D**) GABAergic MVN commissural neurons with different amplitudes. **E,F**, PSTHs of group data show that activation of H1 receptor by application of histamine in the presence of ranitidine and iodophenpropit induced a concentration-dependent excitation on the ipsilesional (**E**) and contralesional (**F**) glutamatergic MVN commissural neurons with similar amplitudes.

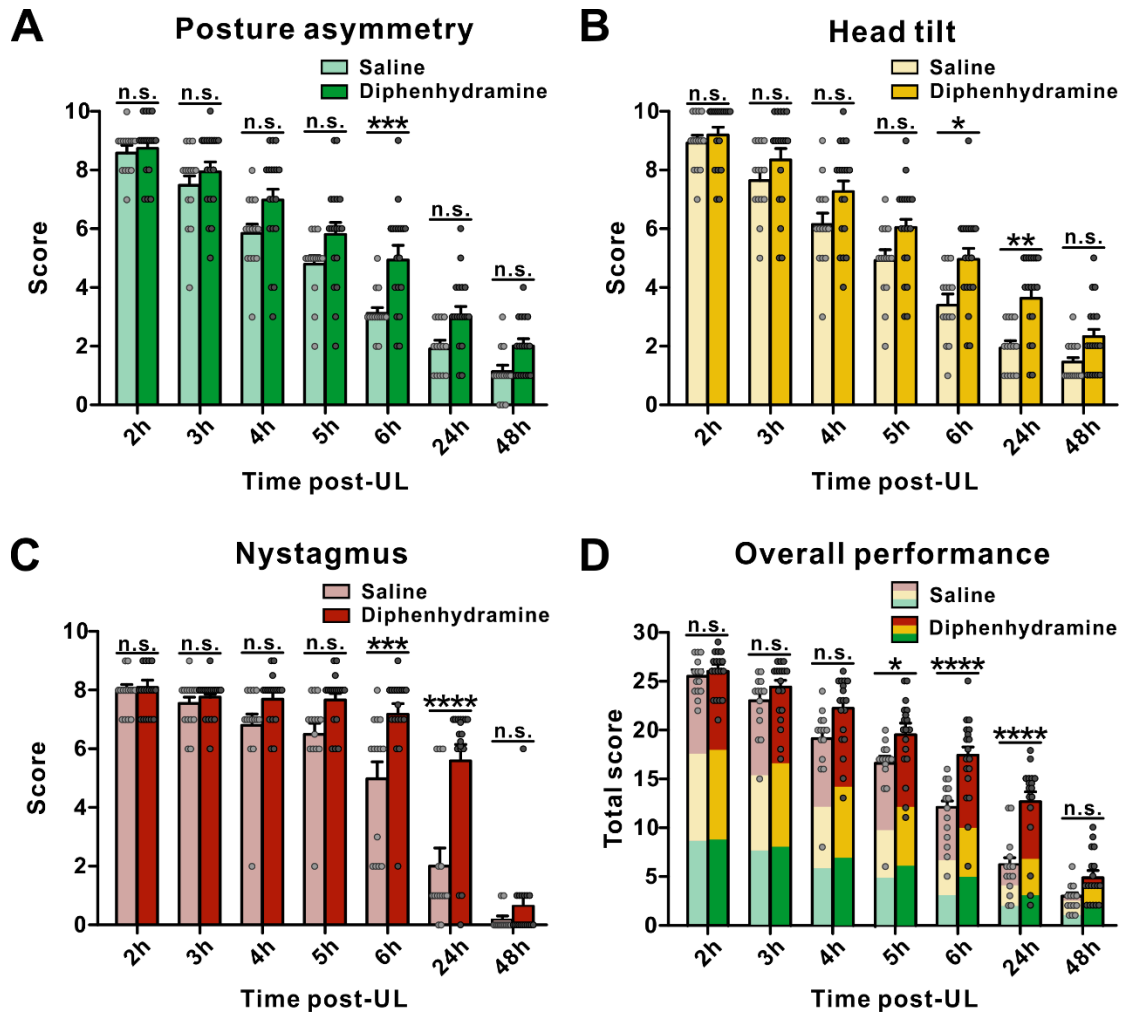

**Figure 5-1.** Intraperitoneal administration of selective histamine H1 receptor antagonist diphenhydramine aggravates static symptoms in UL rats. Related to Figure 5. **A-C**, Histograms illustrating the time course of recovery from posture asymmetry (**A**), head tilt (**B**) and nystagmus (**C**) in two groups injected with diphenhydramine and saline, respectively. **D**, Histogram showing the time course of overall performance of two groups microinjected with mepyramine and saline, respectively. Data shown are means  $\pm$  SEM; \* $P < 0.05$ , \*\* $P < 0.01$ , \*\*\* $P < 0.001$ , \*\*\*\* $P < 0.0001$ , n.s. no significant difference, by repeated-measures ANOVA followed by Bonferroni's test.

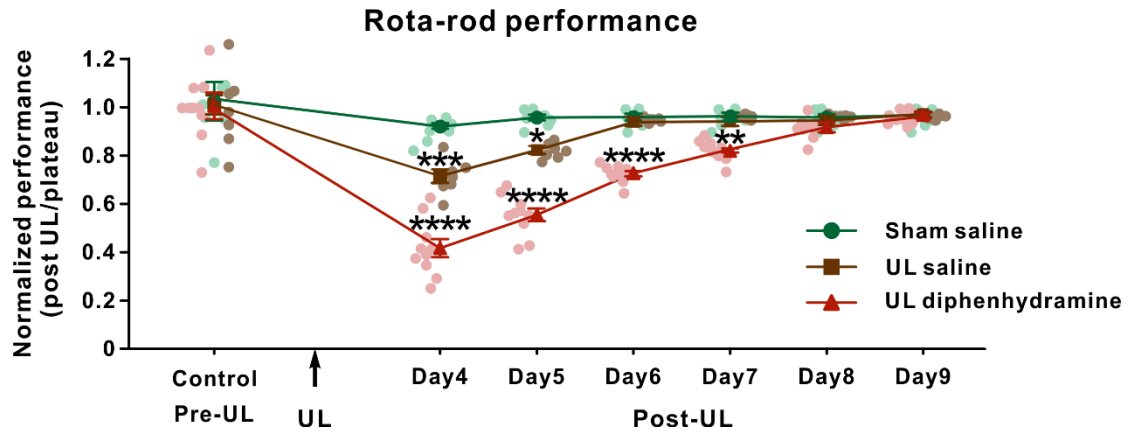

**Figure 7-1.** Intraperitoneal administration of diphenhydramine retard recovery of motor balance and coordination in UL rats. Rats were trained consecutively for 4 days pre-UL. Related to Figure 7. The test began on day 4 post-UL. Curves illustrating the time course of the recovery of motor balance and coordination in rota-rod test after UL in the sham group microinjected with saline (*green* dots), the UL group microinjected with saline (*brown* squares) and the UL group microinjected with diphenhydramine (*red* triangles). Data represent mean  $\pm$  SEM; \* $P < 0.05$ , \*\* $P < 0.01$ , \*\*\* $P < 0.001$ , \*\*\*\* $P < 0.0001$ , by repeated-measures ANOVA followed by Bonferroni's test.
